# Supplementary material
Source: PubMed Central journal article supplement (PMC6641531)
Supplement: ao7b01741_si_001.pdf [file ao7b01741_si_001.pdf]

## Supporting Information

# Investigations on the Effect of Fatty Acid Additives on Casein Micelles: Role of Ethylenic Unsaturation on the Interaction and Structural Diversity

Sudipta Panja, Deb Kumar Khatua, and Mintu Halder\*

Department of Chemistry, Indian Institute of Technology Kharagpur

Kharagpur-721302, India

\*Corresponding author: mintu@chem.iitkgp.ernet.in

Phone: +91-3222-283314, FAX: +91-3222-282252

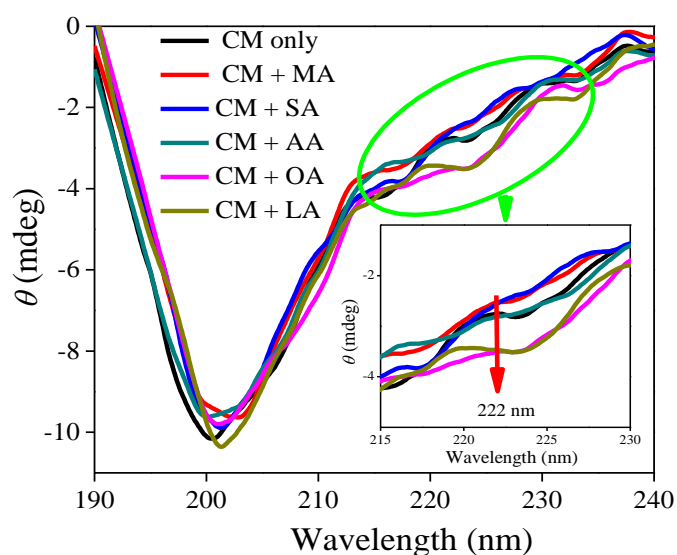

**Figure S1.** Far-UV CD spectra of the CMs ( $0.1 \text{ mg ml}^{-1}$ ) in presence of different fatty acids ( $50 \mu\text{M}$ ) at 298K.

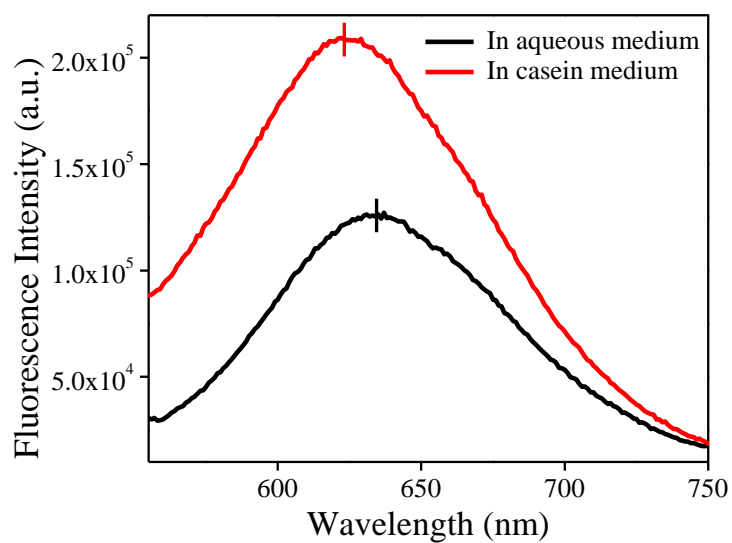

**Figure S2.** Fluorescence spectra of DCM (5  $\mu\text{M}$ ) in the absence and presence of CMs (0.05  $\text{mg ml}^{-1}$ ) at 298 K.

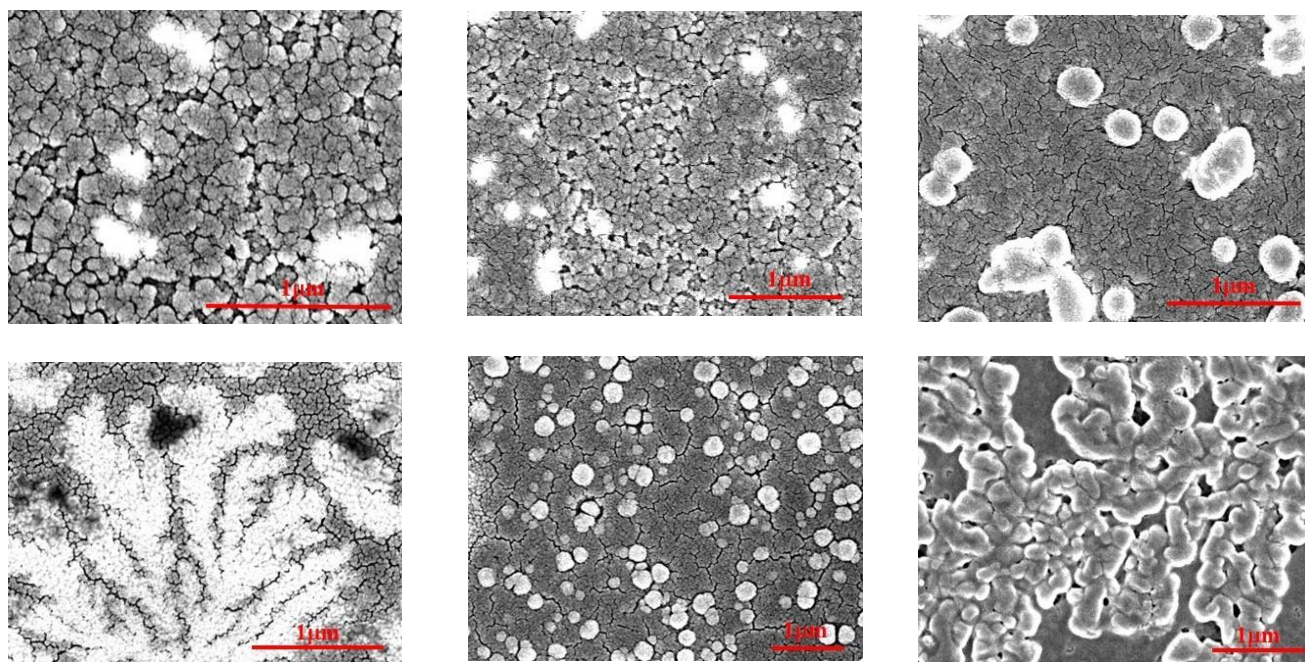

**Figure S3.** FESEM images of CMs (0.05  $\text{mg ml}^{-1}$ ) (a) in the absence of fatty acids and presence of (b) MA, (c) SA, (d) AA, (e) OA, and (f) LA (50  $\mu\text{M}$ ).

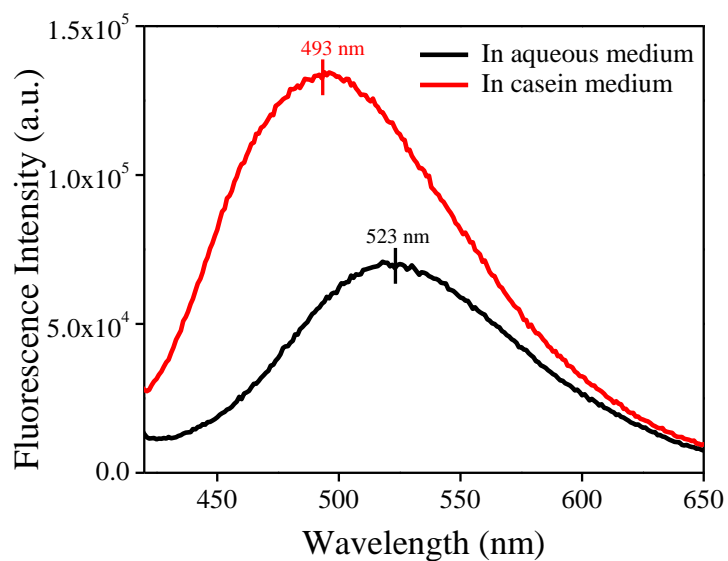

**Figure S4.** Fluorescence spectra of ANS ( $5 \mu\text{M}$ ) in the absence and presence of CMs ( $0.05 \text{ mg ml}^{-1}$ ) at 298 K.

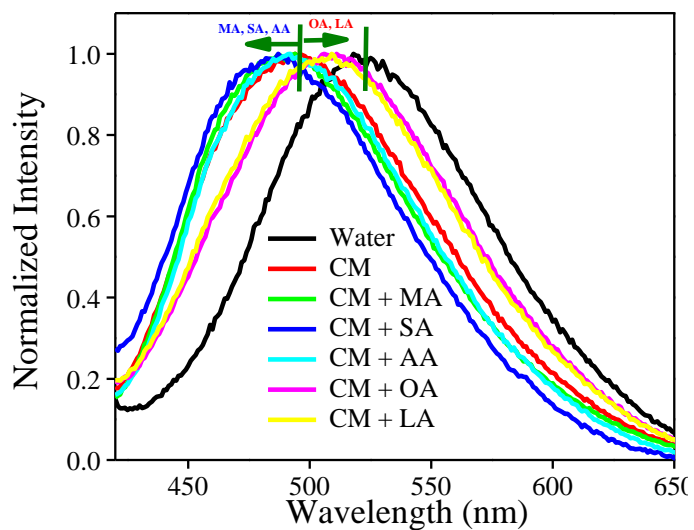

**Figure S5.** Normalized fluorescence spectra of ANS ( $5 \mu\text{M}$ ) after addition of various fatty acids ( $50 \mu\text{M}$ ) in the CMs ( $0.05 \text{ mg ml}^{-1}$ ) at 298 K.

**Table S1.** Translational diffusion parameter of DCM in water, CMs, and in the presence of different fatty acid with CMs

| <b>System</b>  | <b><math>D_{11}</math> (<math>\mu\text{m}^2 \text{s}^{-1}</math>)</b> | <b><math>D_{12}</math> (<math>\mu\text{m}^2 \text{s}^{-1}</math>)</b> |
|----------------|-----------------------------------------------------------------------|-----------------------------------------------------------------------|
| <b>Water</b>   | 302.78                                                                | -                                                                     |
| <b>CM</b>      | 302.78 (0.87)                                                         | 24.01 (0.13)                                                          |
| <b>CM + MA</b> | 302.78 (0.88)                                                         | 20.23 (0.12)                                                          |
| <b>CM + SA</b> | 302.78 (0.84)                                                         | 19.73 (0.16)                                                          |
| <b>CM + AA</b> | 302.78 (0.87)                                                         | 18.32 (0.13)                                                          |
| <b>CM + OA</b> | 302.78 (0.70)                                                         | 13.10 (0.30)                                                          |
| <b>CM + LA</b> | 302.78 (0.74)                                                         | 14.41 (0.26)                                                          |
